# Supplementary material
Source: MDPI journal article supplement (https://www.mdpi.com/2073-4395/13/4/1106)
Supplement: s1 [file s1]

Table S1. Microsatellite (simple sequence repeats – SSR) code, DNA sequences, annealing temperatures, fluorescence labels and references among 15 primer pairs used for genotyping of 671 apple embryos, the mother cultivars, and potential pollinizers.

| SSR name | Forward primer            | Reverse primer           | Annealing temperatures             | Fluorescence labels | Reference |
|----------|---------------------------|--------------------------|------------------------------------|---------------------|-----------|
| MIX1     |                           |                          |                                    |                     |           |
| CH02B10  | CAAGGAAATCATCAAAGATTCAAG  | CAAGTGGCTTCGGATAGTTG     | 51°C                               | 6-FAM               | 1         |
| CH05E03  | CGAATATTTTCACTCTGACTGGG   | CAAGTTGTTGTACTGCTCCGAC   |                                    | HEX                 | 2         |
| CH02C02a | CTTCAAGTTCAGCATCAAGACAA   | TAGGGCACACTTGCTGGTC      |                                    | TAMRA               | 2         |
| MIX2     |                           |                          |                                    |                     |           |
| CH03D12  | GCCCAGAAGCAATAAGTAAACC    | ATTGCTCCATGCATAAAGGG     | 51°C                               | HEX                 | 2         |
| CH02C11  | TGAAGGCAATCACTCTGTGC      | TTCCGAGAATCCTCTTCGAC     |                                    | HEX                 | 2         |
| CH01D03  | CCACTTGGCAATGACTCCTC      | ACCTTACCGCCAATGTGAAG     |                                    | TAMRA               | 2         |
| MIX3     |                           |                          |                                    |                     |           |
| CH01F07a | CCCTACACAGTTTCTCAACCC     | CGTTTTTGGAGCGTAGGAAC     | 51°C                               | 6-FAM               | 2         |
| CH04E03  | TTGAAGATGTTTGGCTGTGC      | TGCATGTCTGTCTCCTCCAT     |                                    | HEX                 | 2         |
| CH01D09  | CCCTTCATTACATTTCCAG       | GCCATCTGAACAGAATGTGC     |                                    | TAMRA               | 2         |
| MIX4     |                           |                          |                                    |                     |           |
| CH01H01  | GAAAGACTTGCAGTGGGAGC      | GGAGTGGGTTTGAGAAGGTT     | 61°C (-0.5°C/cycle) x 6; 61°C x 24 | 6-FAM               | 1         |
| CH01H02  | AGAGCTTCGAGCTTCGTTTG      | ATCTTTTGGTGCTCCCACAC     |                                    | 6-FAM               | 1         |
| CH01H10  | TGCAAAGATAGGTAGATATATGCCA | AGGAGGGATTGTTTGTGCAC     |                                    | HEX                 | 1         |
| MIX5     |                           |                          |                                    |                     |           |
| CH02C02b | TGCATGCATGGAAACGAC        | TGGAAAAAGTCACACTGCTCC    | 65°C (-1°C/cycle) x 4; 62°C x 29   | 6-FAM               | 2         |
| CH04E02  | GGCGATGACTACCAGGAAAA      | ATGTAGCCAAGCCAGCGTAT     |                                    | HEX                 | 2         |
| CH02D08  | TCCAAAATGGCGTACCTCTC      | GCAGACACTCACTCACTATCTCTC |                                    | TAMRA               | 2         |

1 Gianfranceschi et al. (1998)

2 Liebhard et al. (2002)

Table S2. Number of alleles per locus (Na) and gene diversity (He) (Nei, 1978) for the 11 main apple cultivars ('Asfari', 'Aroma', 'Discovery', 'Eden', 'Elstar', 'Fryd', 'Julyred', 'Katja', 'Rubinstep', 'Summerred' and 'Vista Bella') and crabapples ('Dolgo', 'Evereste', 'Golden Hornet', 'Ko Benza', 'Professor Sprengler' and 'Red Sentinel'), as well for embryos, collected from the main cultivars in 2021 and 2022, based on 15 SSR (simple sequence repeat) loci. The cultivar 'Gravenstein' was excluded due to its triploid state.

|                         |       | CH02C02b | CH04E02 | CH02D08 | CH03D12 | CH02C11 | CH01D03 | CH01H01 | CH01H02 | CH01H10 | CH01F07a | CH04E03 | CH01D09 | CH02B10 | CH05E03 | CH02C02a | Mean  |
|-------------------------|-------|----------|---------|---------|---------|---------|---------|---------|---------|---------|----------|---------|---------|---------|---------|----------|-------|
| Main cv. and crabapples | Na    | 4        | 7       | 8       | 15      | 11      | 12      | 10      | 7       | 11      | 10       | 12      | 14      | 11      | 17      | 9        | 10.53 |
|                         | Na'21 | 2        | 2       | 3       | 3       | 3       | 3       | 4       | 2       | 4       | 3        | 4       | 4       | 4       | 4       | 3        | 3.20  |
| 'Asfari'                | Na'22 | 2        | 2       | 5       | 3       | 3       | 3       | 5       | 2       | 5       | 3        | 4       | 3       | 4       | 4       | 2        | 3.33  |
|                         | Na'21 | 2        | 3       | 5       | 5       | 7       | 4       | 5       | 3       | 5       | 6        | 6       | 4       | 6       | 5       | 5        | 4.73  |
| 'Aroma'                 | Na'22 | 2        | 4       | 5       | 5       | 6       | 3       | 4       | 4       | 5       | 5        | 6       | 3       | 5       | 4       | 4        | 4.33  |
|                         | Na'21 | 2        | 5       | 5       | 7       | 6       | 6       | 6       | 4       | 6       | 8        | 7       | 7       | 5       | 9       | 6        | 5.93  |
| 'Discovery'             | Na'22 | 2        | 4       | 5       | 3       | 5       | 4       | 5       | 3       | 5       | 4        | 5       | 5       | 4       | 5       | 3        | 4.13  |
|                         | Na'21 | 2        | 5       | 5       | 6       | 6       | 5       | 6       | 4       | 3       | 6        | 5       | 6       | 4       | 7       | 3        | 4.87  |
| 'Eden'                  | Na'22 | 2        | 5       | 4       | 6       | 7       | 4       | 4       | 3       | 4       | 5        | 4       | 6       | 3       | 5       | 2        | 4.27  |
|                         | Na'21 | 2        | 3       | 5       | 4       | 5       | 3       | 5       | 3       | 6       | 4        | 5       | 5       | 6       | 6       | 4        | 4.40  |
| 'Elstar'                | Na'22 | 2        | 4       | 4       | 5       | 6       | 3       | 5       | 3       | 7       | 5        | 5       | 5       | 6       | 6       | 3        | 4.60  |
|                         | Na'21 | 3        | 5       | 4       | 7       | 8       | 4       | 5       | 3       | 3       | 6        | 5       | 7       | 4       | 7       | 2        | 4.87  |
| 'Fryd'                  | Na'22 | 2        | 6       | 4       | 7       | 8       | 4       | 6       | 4       | 5       | 5        | 4       | 7       | 5       | 6       | 4        | 5.13  |
|                         | Na'21 | 3        | 4       | 6       | 5       | 7       | 4       | 5       | 5       | 6       | 5        | 7       | 4       | 6       | 3       | 4        | 4.93  |
| 'Julyred'               | Na'22 | 2        | 3       | 4       | 3       | 4       | 2       | 4       | 3       | 4       | 4        | 5       | 4       | 4       | 3       | 3        | 3.47  |
|                         | Na'21 | 2        | 4       | 3       | 3       | 4       | 2       | 4       | 2       | 4       | 4        | 4       | 4       | 4       | 4       | 3        | 3.40  |
| 'Katja'                 | Na'22 | 2        | 4       | 6       | 2       | 6       | 3       | 5       | 3       | 6       | 3        | 5       | 4       | 3       | 4       | 3        | 3.93  |
|                         | Na'21 | 3        | 5       | 6       | 10      | 9       | 7       | 7       | 5       | 9       | 6        | 10      | 8       | 7       | 10      | 5        | 7.13  |
| 'Rubinstep'             | Na'22 | 3        | 4       | 5       | 5       | 7       | 6       | 7       | 4       | 10      | 6        | 6       | 6       | 7       | 8       | 5        | 5.93  |
|                         | Na'21 | 3        | 5       | 9       | 9       | 9       | 7       | 7       | 5       | 7       | 7        | 9       | 7       | 6       | 10      | 6        | 7.07  |
| 'Summerred'             | Na'22 | 3        | 4       | 7       | 5       | 8       | 6       | 7       | 4       | 7       | 5        | 8       | 4       | 7       | 11      | 5        | 6.07  |
|                         | Na'21 | 2        | 5       | 4       | 6       | 7       | 4       | 5       | 3       | 6       | 6        | 6       | 4       | 6       | 8       | 3        | 5.00  |
| 'Vista Bella'           | Na'22 | 2        | 5       | 4       | 4       | 7       | 3       | 6       | 2       | 6       | 6        | 6       | 4       | 5       | 8       | 5        | 4.87  |

Table S1. continued.

|                            |       | CH02C02b | CH04E02 | CH02D08 | CH03D12 | CH02C11 | CH01D03 | CH01H01 | CH01H02 | CH01H10 | CH01F07a | CH04E03 | CH01D09 | CH02B10 | CH05E03 | CH02C02a | Mean |
|----------------------------|-------|----------|---------|---------|---------|---------|---------|---------|---------|---------|----------|---------|---------|---------|---------|----------|------|
| Main cv. and<br>crabapples | He    | 0.58     | 0.59    | 0.82    | 0.86    | 0.88    | 0.88    | 0.84    | 0.64    | 0.80    | 0.84     | 0.86    | 0.86    | 0.80    | 0.91    | 0.74     | 0.79 |
|                            | He'21 | 0.50     | 0.26    | 0.60    | 0.62    | 0.61    | 0.57    | 0.72    | 0.36    | 0.71    | 0.65     | 0.71    | 0.64    | 0.65    | 0.64    | 0.46     | 0.58 |
| 'Asfari'                   | He'22 | 0.50     | 0.35    | 0.69    | 0.58    | 0.60    | 0.52    | 0.75    | 0.26    | 0.76    | 0.64     | 0.74    | 0.57    | 0.74    | 0.74    | 0.03     | 0.56 |
|                            | He'21 | 0.44     | 0.35    | 0.68    | 0.68    | 0.79    | 0.61    | 0.72    | 0.49    | 0.62    | 0.76     | 0.73    | 0.66    | 0.74    | 0.66    | 0.69     | 0.64 |
| 'Aroma'                    | He'22 | 0.41     | 0.57    | 0.74    | 0.78    | 0.81    | 0.57    | 0.70    | 0.68    | 0.75    | 0.78     | 0.80    | 0.53    | 0.77    | 0.65    | 0.68     | 0.68 |
|                            | He'21 | 0.23     | 0.65    | 0.77    | 0.74    | 0.78    | 0.58    | 0.72    | 0.58    | 0.75    | 0.74     | 0.78    | 0.73    | 0.68    | 0.78    | 0.68     | 0.68 |
| 'Discovery'                | He'22 | 0.03     | 0.66    | 0.75    | 0.61    | 0.72    | 0.55    | 0.76    | 0.51    | 0.71    | 0.64     | 0.75    | 0.70    | 0.60    | 0.70    | 0.52     | 0.61 |
|                            | He'21 | 0.50     | 0.76    | 0.66    | 0.70    | 0.65    | 0.41    | 0.60    | 0.58    | 0.51    | 0.73     | 0.68    | 0.75    | 0.52    | 0.72    | 0.51     | 0.62 |
| 'Eden'                     | He'22 | 0.48     | 0.76    | 0.65    | 0.79    | 0.67    | 0.60    | 0.56    | 0.53    | 0.56    | 0.70     | 0.71    | 0.72    | 0.53    | 0.67    | 0.50     | 0.63 |
|                            | He'21 | 0.50     | 0.45    | 0.70    | 0.60    | 0.78    | 0.57    | 0.71    | 0.40    | 0.67    | 0.64     | 0.68    | 0.68    | 0.68    | 0.73    | 0.61     | 0.63 |
| 'Elstar'                   | He'22 | 0.50     | 0.26    | 0.65    | 0.58    | 0.76    | 0.53    | 0.75    | 0.38    | 0.71    | 0.65     | 0.74    | 0.73    | 0.68    | 0.77    | 0.55     | 0.62 |
|                            | He'21 | 0.47     | 0.72    | 0.68    | 0.77    | 0.68    | 0.33    | 0.70    | 0.46    | 0.50    | 0.65     | 0.62    | 0.76    | 0.45    | 0.71    | 0.50     | 0.60 |
| 'Fryd'                     | He'22 | 0.48     | 0.70    | 0.66    | 0.78    | 0.74    | 0.21    | 0.69    | 0.57    | 0.62    | 0.57     | 0.68    | 0.80    | 0.60    | 0.62    | 0.49     | 0.61 |
|                            | He'21 | 0.52     | 0.42    | 0.70    | 0.65    | 0.80    | 0.58    | 0.70    | 0.69    | 0.62    | 0.78     | 0.79    | 0.60    | 0.74    | 0.58    | 0.59     | 0.65 |
| 'Julyred'                  | He'22 | 0.50     | 0.38    | 0.68    | 0.52    | 0.64    | 0.50    | 0.64    | 0.61    | 0.56    | 0.75     | 0.76    | 0.62    | 0.63    | 0.52    | 0.52     | 0.59 |
|                            | He'21 | 0.50     | 0.61    | 0.57    | 0.56    | 0.54    | 0.44    | 0.67    | 0.46    | 0.61    | 0.63     | 0.61    | 0.66    | 0.65    | 0.66    | 0.43     | 0.57 |
| 'Katja'                    | He'22 | 0.50     | 0.64    | 0.67    | 0.50    | 0.60    | 0.37    | 0.70    | 0.43    | 0.64    | 0.58     | 0.67    | 0.64    | 0.65    | 0.66    | 0.43     | 0.58 |
|                            | He'21 | 0.27     | 0.63    | 0.77    | 0.54    | 0.75    | 0.65    | 0.80    | 0.43    | 0.47    | 0.73     | 0.58    | 0.55    | 0.49    | 0.81    | 0.65     | 0.61 |
| 'Rubinstep'                | He'22 | 0.18     | 0.53    | 0.72    | 0.37    | 0.70    | 0.64    | 0.76    | 0.45    | 0.55    | 0.73     | 0.57    | 0.64    | 0.63    | 0.76    | 0.70     | 0.60 |
|                            | He'21 | 0.51     | 0.56    | 0.81    | 0.77    | 0.82    | 0.67    | 0.72    | 0.66    | 0.72    | 0.74     | 0.78    | 0.74    | 0.70    | 0.83    | 0.66     | 0.71 |
| 'Summerred'                | He'22 | 0.51     | 0.47    | 0.78    | 0.67    | 0.81    | 0.53    | 0.78    | 0.67    | 0.65    | 0.73     | 0.81    | 0.62    | 0.51    | 0.82    | 0.67     | 0.67 |
|                            | He'21 | 0.44     | 0.68    | 0.61    | 0.56    | 0.75    | 0.64    | 0.73    | 0.52    | 0.74    | 0.78     | 0.68    | 0.44    | 0.56    | 0.81    | 0.52     | 0.63 |
| 'Vista Bella'              | He'22 | 0.42     | 0.61    | 0.54    | 0.51    | 0.75    | 0.56    | 0.71    | 0.48    | 0.69    | 0.79     | 0.64    | 0.34    | 0.52    | 0.78    | 0.44     | 0.59 |
